# Supplementary figures and images for: Cluster headache is one of the most intensely painful human conditions: Results from the International Cluster Headache Questionnaire
Source: PubMed Central journal article supplement — Headache. 2020 Dec 18;61(1):117–24. doi: 10.1111/head.14021 (PMC7898696; doi:10.1111/head.14021), 2020-12-18

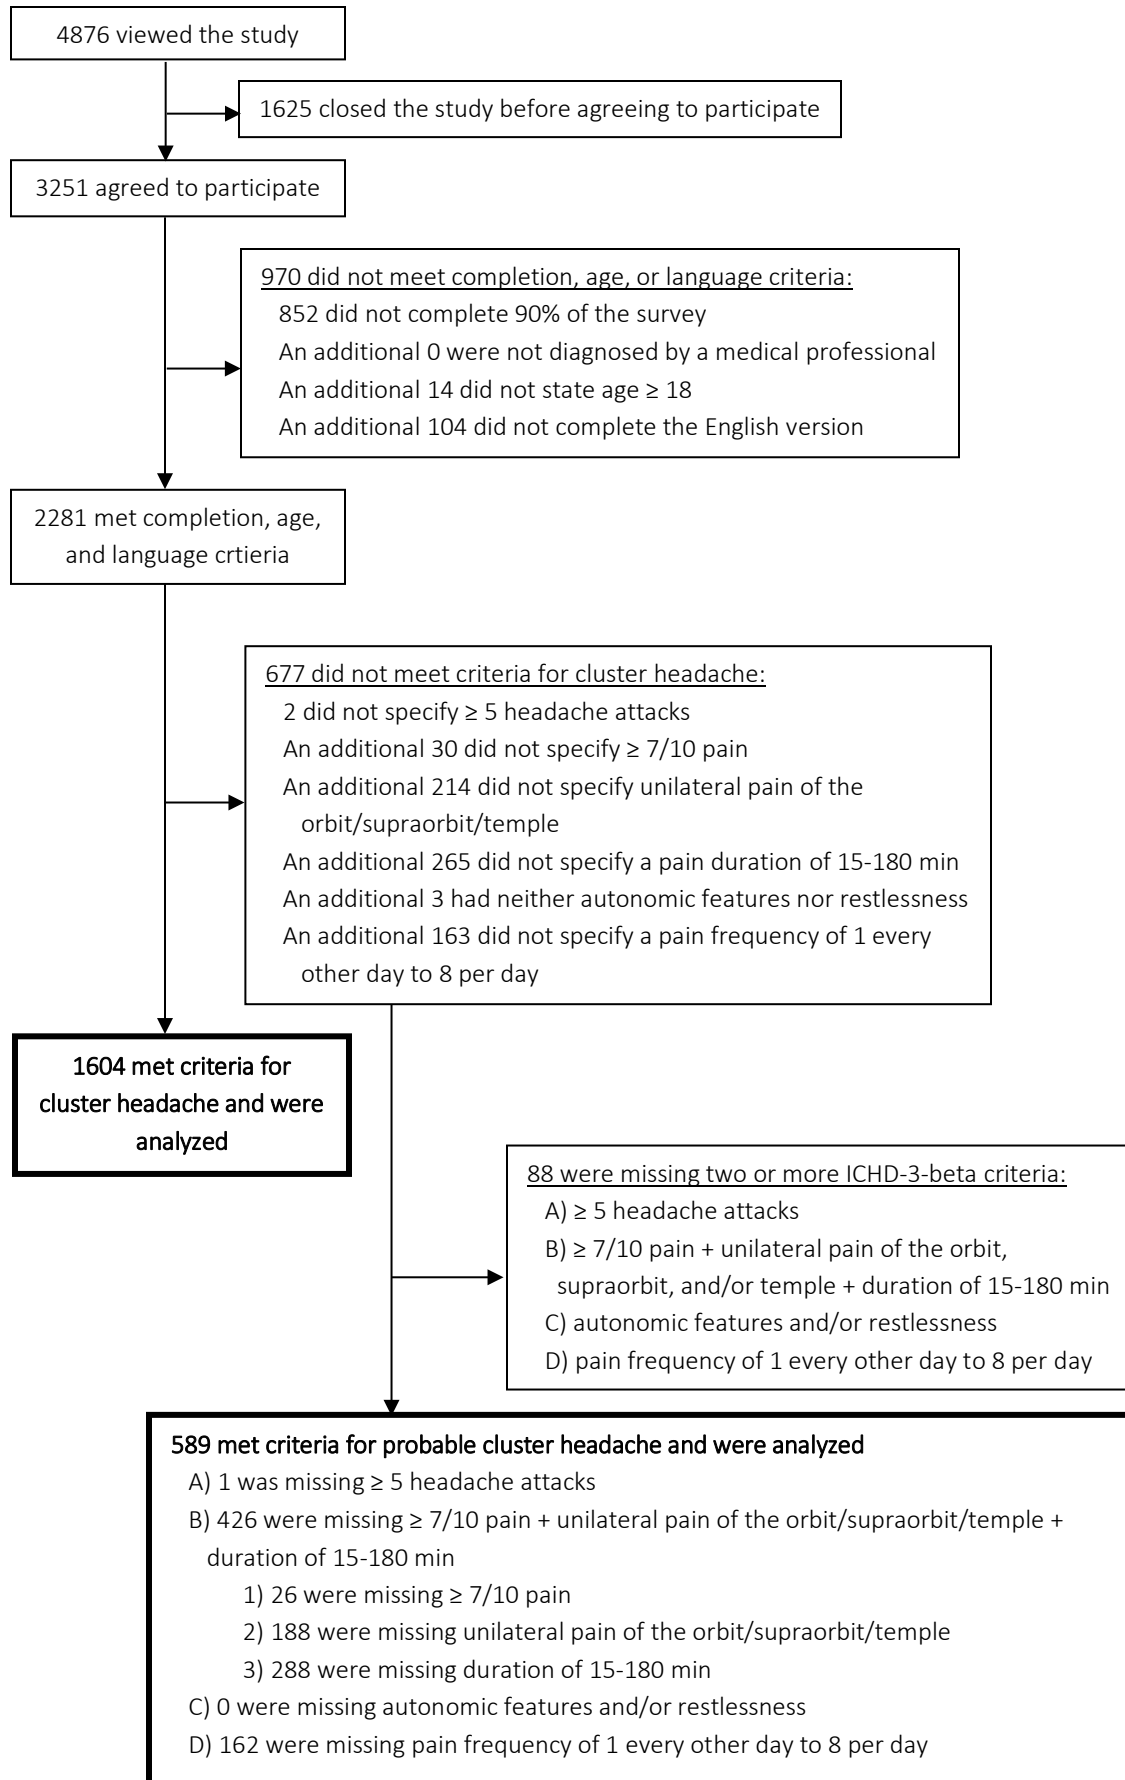

Supplement: HEAD-61-117-s002.pdf [file HEAD-61-117-s002.pdf]
